# Supplementary material
Source: PubMed Central journal article supplement (PMC5996384)
Supplement: NIHMS964168-supplement-Suppl.pdf [file NIHMS964168-supplement-Suppl.pdf]

**Supplementary Table 1.** Models of the diffusion parameters in WMC, parahippocampal and normal-appearing WM with all neuroimaging markers and including the APOE genotype as a variable.

| <b>Model 1</b>            | <b>WMC (subgroup with volume &gt; 1% total WM volume, n = 95)</b> |                            |                            |                            |
|---------------------------|-------------------------------------------------------------------|----------------------------|----------------------------|----------------------------|
| <b>Parameters</b>         | MD ( $\beta$ ; p-value)                                           | DA ( $\beta$ ; p-value)    | DR ( $\beta$ ; p-value)    | FA ( $\beta$ ; p-value)    |
| <b>Group (MCI)</b>        | 0.01; 0.8758                                                      | 0.03; 0.6721               | -0.00; 0.9920              | 0.09; 0.3802               |
| <b>Group (AD)</b>         | 0.18; 0.0514                                                      | 0.14; 0.1317               | <i>0.20; 0.0331</i>        | -0.22; 0.1077              |
| <b>Age</b>                | 0.04; 0.4161                                                      | 0.02; 0.6485               | 0.05; 0.3107               | -0.15; 0.0638              |
| <b>Gender (female)</b>    | 0.02; 0.6687                                                      | 0.01; 0.8442               | 0.03; 0.5656               | -0.09; 0.2792              |
| <b>Education</b>          | 0.06; 0.2429                                                      | 0.04; 0.4547               | 0.07; 0.1719               | -0.13; 0.0815              |
| <b>APOE4 (per allele)</b> | <b>*-0.23; 0.0039</b>                                             | <b>*-0.25; 0.0022</b>      | <i>-0.22; 0.0071</i>       | -0.05; 0.6673              |
| <b>Cortical thickness</b> | 0.04; 0.5646                                                      | -0.01; 0.8686              | 0.06; 0.3212               | <b>*-0.27; 0.0034</b>      |
| <b>Hippocampal vol.</b>   | 0.11; 0.1389                                                      | 0.10; 0.1651               | 0.11; 0.1377               | -0.13; 0.2357              |
| <b>Ventricular volume</b> | <b>***0.57; &lt;0.0001</b>                                        | <b>***0.60; &lt;0.0001</b> | <b>***0.54; &lt;0.0001</b> | 0.09; 0.2860               |
| <b>Volume of WMC</b>      | <i>-0.21; 0.0162</i>                                              | <i>-0.20; 0.0195</i>       | <i>-0.22; 0.0150</i>       | -0.06; 0.6055              |
| <b>Total WM volume</b>    | <i>-0.12; 0.0290</i>                                              | <i>-0.12; 0.0352</i>       | <i>-0.12; 0.0304</i>       | 0.09; 0.2553               |
| <b>Norm. properties</b>   | <b>***0.58; &lt;0.0001</b>                                        | <b>***0.57; &lt;0.0001</b> | <b>***0.59; &lt;0.0001</b> | <b>***0.54; &lt;0.0001</b> |
| <b>Translation motion</b> | <b>*0.30; 0.0031</b>                                              | <i>0.22; 0.0259</i>        | <b>*0.34; 0.0010</b>       | <b>*-0.46; 0.0020</b>      |
| <b>Rotation motion</b>    | <i>-0.27; 0.0053</i>                                              | <i>-0.21; 0.0273</i>       | <b>*-0.30; 0.0025</b>      | <i>0.31; 0.0273</i>        |

  

| <b>Model 2</b>            | <b>Parahippocampal WM (all, n = 169)</b> |                         |                         |                         |
|---------------------------|------------------------------------------|-------------------------|-------------------------|-------------------------|
| <b>Parameters</b>         | MD ( $\beta$ ; p-value)                  | DA ( $\beta$ ; p-value) | DR ( $\beta$ ; p-value) | FA ( $\beta$ ; p-value) |
| <b>Group (MCI)</b>        | -0.06; 0.5322                            | 0.02; 0.8029            | -0.09; 0.2743           | 0.13; 0.1244            |
| <b>Group (AD)</b>         | 0.09; 0.5428                             | -0.03; 0.8377           | 0.14; 0.2970            | -0.23; 0.0940           |
| <b>Age</b>                | 0.03; 0.7199                             | -0.01; 0.9273           | 0.05; 0.5503            | -0.10; 0.2164           |
| <b>Gender (female)</b>    | 0.02; 0.8113                             | -0.04; 0.5837           | 0.05; 0.4932            | <i>-0.15; 0.0365</i>    |
| <b>Education</b>          | 0.10; 0.1641                             | 0.05; 0.5570            | 0.12; 0.0784            | <i>-0.13; 0.0441</i>    |
| <b>APOE4 (per allele)</b> | 0.14; 0.1976                             | 0.06; 0.5995            | 0.17; 0.1010            | -0.17; 0.0856           |
| <b>Cortical thickness</b> | <i>-0.22; 0.0143</i>                     | -0.16; 0.1022           | <i>-0.24; 0.0060</i>    | <i>0.20; 0.0181</i>     |
| <b>Hippocampal vol.</b>   | <i>-0.25; 0.0184</i>                     | -0.22; 0.0555           | <i>-0.25; 0.0146</i>    | 0.18; 0.0657            |
| <b>Ventricular volume</b> | -0.01; 0.9290                            | -0.06; 0.5561           | 0.02; 0.8308            | -0.03; 0.7256           |
| <b>Volume of WMC</b>      | 0.11; 0.2120                             | 0.11; 0.2669            | 0.11; 0.2163            | -0.09; 0.3014           |
| <b>Total WM volume</b>    | -0.04; 0.6445                            | 0.08; 0.3985            | -0.09; 0.2316           | <b>*0.24; 0.0025</b>    |
| <b>Translation motion</b> | -0.03; 0.8415                            | 0.06; 0.6677            | -0.07; 0.5776           | 0.14; 0.2762            |
| <b>Rotation motion</b>    | 0.15; 0.2346                             | 0.05; 0.7389            | 0.20; 0.1091            | <i>-0.24; 0.0481</i>    |

  

| <b>Model 3</b>     | <b>Normal-appearing white matter (all, n = 169)</b> |                         |                         |                         |
|--------------------|-----------------------------------------------------|-------------------------|-------------------------|-------------------------|
| <b>Parameters</b>  | MD ( $\beta$ ; p-value)                             | DA ( $\beta$ ; p-value) | DR ( $\beta$ ; p-value) | FA ( $\beta$ ; p-value) |
| <b>Group (MCI)</b> | 0.06; 0.4806                                        | 0.13; 0.1583            | 0.02; 0.7726            | 0.07; 0.3592            |
| <b>Group (AD)</b>  | -0.03; 0.8115                                       | -0.05; 0.7202           | -0.02; 0.8723           | 0.02; 0.8967            |
| <b>Age</b>         | 0.08; 0.2896                                        | 0.13; 0.1263            | 0.05; 0.4562            | 0.02; 0.8026            |

|                           |                            |                       |                            |                             |
|---------------------------|----------------------------|-----------------------|----------------------------|-----------------------------|
| <b>Gender (female)</b>    | 0.03; 0.6492               | 0.03; 0.6882          | 0.03; 0.6496               | -0.02; 0.8062               |
| <b>Education</b>          | 0.12; 0.0654               | 0.11; 0.1330          | 0.12; 0.0566               | -0.08; 0.2076               |
| <b>APOE4 (per allele)</b> | 0.01; 0.9015               | 0.02; 0.8180          | 0.01; 0.9524               | 0.01; 0.9120                |
| <b>Cortical thickness</b> | -0.13; 0.1182              | -0.13; 0.1328         | -0.12; 0.1347              | 0.05; 0.5490                |
| <b>Hippocampal vol.</b>   | 0.03; 0.7405               | -0.08; 0.4598         | 0.08; 0.3840               | -0.16; 0.0976               |
| <b>Ventricular volume</b> | 0.05; 0.5436               | 0.10; 0.2563          | 0.02; 0.7712               | 0.09; 0.2716                |
| <b>Volume of WMC</b>      | <b>***0.39; &lt;0.0001</b> | <i>0.23; 0.0123</i>   | <b>***0.45; &lt;0.0001</b> | <b>***-0.52; &lt;0.0001</b> |
| <b>Total WM volume</b>    | -0.14; 0.0545              | -0.02; 0.7581         | <i>-0.19; 0.0084</i>       | <b>*0.25; 0.0011</b>        |
| <b>Translation motion</b> | -0.15; 0.2049              | <i>-0.31; 0.0209</i>  | -0.07; 0.5247              | -0.21; 0.0861               |
| <b>Rotation motion</b>    | <b>**0.41; 0.0006</b>      | <b>**0.48; 0.0002</b> | <b>*0.35; 0.0018</b>       | -0.14; 0.2327               |

All continuous variables were standardized prior to applying the model for easier comparison of parameter estimates ( $\beta$ ). Uncorrected p-values are presented and significant associations with corrected  $p < 0.05$  are bolded (\*, \*\* and \*\*\* for corrected  $p < 0.05$ , 0.01 and 0.001 respectively). Associations with uncorrected  $p < 0.05$  are italicized. (WMC, white matter changes; WM, white matter).

**Supplementary Table 2.** Models of the diffusion parameters in WMC, parahippocampal and normal-appearing WM with factors extracted from the neuroimaging markers and including APOE genotype as a variable.

| <b>Model 4</b>                                                    |                                         |                                         |                                         |                                         |
|-------------------------------------------------------------------|-----------------------------------------|-----------------------------------------|-----------------------------------------|-----------------------------------------|
| <b>WMC (subgroup with volume &gt; 1% total WM volume, n = 95)</b> |                                         |                                         |                                         |                                         |
| <b>Parameters</b>                                                 | <b>MD (<math>\beta</math>; p-value)</b> | <b>DA (<math>\beta</math>; p-value)</b> | <b>DR (<math>\beta</math>; p-value)</b> | <b>FA (<math>\beta</math>; p-value)</b> |
| <b>Group (MCI)</b>                                                | 0.01; 0.8554                            | 0.04; 0.6554                            | 0.00; 0.9987                            | 0.11; 0.2653                            |
| <b>Group (AD)</b>                                                 | 0.01; 0.9334                            | -0.04; 0.6964                           | 0.04; 0.7248                            | -0.20; 0.1342                           |
| <b>Age</b>                                                        | -0.02; 0.7735                           | -0.02; 0.7109                           | -0.01; 0.8410                           | -0.17; 0.0302                           |
| <b>Gender (female)</b>                                            | 0.05; 0.4395                            | 0.05; 0.4654                            | 0.05; 0.4038                            | -0.14; 0.0738                           |
| <b>Education</b>                                                  | 0.08; 0.1800                            | 0.06; 0.3555                            | 0.10; 0.1181                            | -0.12; 0.0972                           |
| <b>APOE4 (per allele)</b>                                         | -0.23; 0.0174                           | -0.26; 0.0099                           | -0.22; 0.0272                           | -0.05; 0.6481                           |
| <b>Factor 1</b>                                                   | <b>***-0.50; &lt;0.0001</b>             | <b>***-0.51; &lt;0.0001</b>             | <b>***-0.47; &lt;0.0001</b>             | -0.10; 0.2652                           |
| <b>Factor 2</b>                                                   | -0.18; 0.0104                           | <b>*-0.24; 0.0011</b>                   | -0.15; 0.0403                           | <b>** -0.33; 0.0002</b>                 |
| <b>Norm. properties</b>                                           | <b>***0.90; &lt;0.0001</b>              | <b>***0.89; &lt;0.0001</b>              | <b>***0.89; &lt;0.0001</b>              | <b>***0.52; &lt;0.0001</b>              |
| <b>Translation motion</b>                                         | 0.19; 0.1113                            | 0.12; 0.3212                            | 0.24; 0.0538                            | <b>*-0.43; 0.0034</b>                   |
| <b>Rotation motion</b>                                            | -0.22; 0.0651                           | -0.16; 0.1868                           | -0.25; 0.0348                           | 0.29; 0.0382                            |

  

| <b>Model 5</b>                           |                                         |                                         |                                         |                                         |
|------------------------------------------|-----------------------------------------|-----------------------------------------|-----------------------------------------|-----------------------------------------|
| <b>Parahippocampal WM (all, n = 169)</b> |                                         |                                         |                                         |                                         |
| <b>Parameters</b>                        | <b>MD (<math>\beta</math>; p-value)</b> | <b>DA (<math>\beta</math>; p-value)</b> | <b>DR (<math>\beta</math>; p-value)</b> | <b>FA (<math>\beta</math>; p-value)</b> |
| <b>Group (MCI)</b>                       | -0.04; 0.6751                           | 0.05; 0.6150                            | -0.08; 0.3498                           | 0.13; 0.1225                            |
| <b>Group (AD)</b>                        | 0.14; 0.3139                            | 0.03; 0.8646                            | 0.19; 0.1538                            | -0.25; 0.0568                           |
| <b>Age</b>                               | 0.06; 0.4492                            | 0.02; 0.7787                            | 0.07; 0.3261                            | -0.12; 0.1045                           |
| <b>Gender (female)</b>                   | -0.01; 0.8748                           | -0.09; 0.2706                           | 0.03; 0.6770                            | -0.16; 0.0196                           |
| <b>Education</b>                         | 0.09; 0.1994                            | 0.03; 0.6780                            | 0.11; 0.0891                            | -0.13; 0.0422                           |
| <b>APOE4 (per allele)</b>                | 0.14; 0.1839                            | 0.07; 0.5638                            | 0.17; 0.0943                            | -0.18; 0.0860                           |
| <b>Factor 1</b>                          | <b>*-0.28; 0.0014</b>                   | -0.11; 0.2343                           | <b>***-0.35; &lt;0.0001</b>             | <b>***0.43; &lt;0.0001</b>              |
| <b>Factor 2</b>                          | <b>** -0.29; 0.0003</b>                 | -0.21; 0.0160                           | <b>***-0.31; &lt;0.0001</b>             | <b>**0.27; 0.0005</b>                   |
| <b>Translation motion</b>                | 0.02; 0.8464                            | 0.12; 0.3942                            | -0.03; 0.8312                           | 0.12; 0.3359                            |
| <b>Rotation motion</b>                   | 0.12; 0.3403                            | 0.01; 0.9335                            | 0.17; 0.1624                            | -0.23; 0.0582                           |

  

| <b>Model 6</b>                                      |                                         |                                         |                                         |                                         |
|-----------------------------------------------------|-----------------------------------------|-----------------------------------------|-----------------------------------------|-----------------------------------------|
| <b>Normal-appearing white matter (all, n = 169)</b> |                                         |                                         |                                         |                                         |
| <b>Parameters</b>                                   | <b>MD (<math>\beta</math>; p-value)</b> | <b>DA (<math>\beta</math>; p-value)</b> | <b>DR (<math>\beta</math>; p-value)</b> | <b>FA (<math>\beta</math>; p-value)</b> |
| <b>Group (MCI)</b>                                  | 0.06; 0.4774                            | 0.14; 0.1273                            | 0.02; 0.7983                            | 0.08; 0.3740                            |
| <b>Group (AD)</b>                                   | -0.07; 0.6142                           | -0.05; 0.6984                           | -0.07; 0.5985                           | 0.08; 0.5839                            |
| <b>Age</b>                                          | 0.13; 0.0882                            | 0.14; 0.0706                            | 0.11; 0.1245                            | -0.07; 0.3871                           |
| <b>Gender (female)</b>                              | 0.05; 0.4553                            | 0.02; 0.8078                            | 0.06; 0.3455                            | -0.07; 0.3281                           |
| <b>Education</b>                                    | 0.09; 0.1890                            | 0.09; 0.1968                            | 0.08; 0.2172                            | -0.03; 0.6619                           |
| <b>APOE4 (per allele)</b>                           | 0.02; 0.8789                            | 0.03; 0.7936                            | 0.01; 0.9306                            | 0.01; 0.9459                            |
| <b>Factor 1</b>                                     | <b>***-0.41; &lt;0.0001</b>             | <b>** -0.32; 0.0003</b>                 | <b>***-0.43; &lt;0.0001</b>             | <b>***0.37; &lt;0.0001</b>              |
| <b>Factor 2</b>                                     | -0.21; 0.0054                           | -0.22; 0.0056                           | -0.19; 0.0094                           | 0.09; 0.2389                            |
| <b>Translation motion</b>                           | -0.17; 0.1665                           | -0.30; 0.0215                           | -0.10; 0.4067                           | -0.17; 0.1848                           |

---

|                        |                       |                       |                      |               |
|------------------------|-----------------------|-----------------------|----------------------|---------------|
| <b>Rotation motion</b> | <b>**0.42; 0.0005</b> | <b>**0.48; 0.0002</b> | <b>*0.37; 0.0017</b> | -0.17; 0.1947 |
|------------------------|-----------------------|-----------------------|----------------------|---------------|

---

All continuous variables were standardized prior to applying the model for easier comparison of parameter estimates ( $\beta$ ). Uncorrected p-values are presented and significant associations with corrected  $p < 0.05$  are bolded (\*, \*\* and \*\*\* for corrected  $p < 0.05$ , 0.01 and 0.001 respectively). Associations with uncorrected  $p < 0.05$  are italicized. (WMC, white matter changes; WM, white matter).

**Supplementary Figure 1.** Examples of automated WMC segmentation by FreeSurfer in controls and individuals with MCI and AD with a) a low volume of WMC approximating 1% of total WM volume and b) a high volume of WMC approximating 5% of total WM volume. The WMC segmentation is represented by light purple. The rest of the segmentation corresponds to the standard color table freely available on the FreeSurfer website, though the segmentation of the inferior lateral ventricles was modified to a deep purple color like the rest of the ventricles to avoid confusion with the WMC segmentation.

**Supplementary Figure 2.** Scatterplots of volume of WMC, total WM volume, ventricular volume, hippocampal volume, and AD signature cortical thickness displayed as a correlation matrix. Hippocampal, ventricular, and total WM volumes were normalized by the estimated total intracranial volume. The natural logarithm of the volume of WMC divided by the total WM volume was used. Pearson's correlation coefficients and their associated p-values are shown on opposite sides of the diagonal. (WMC, white matter changes; WM, white matter; eTIV, estimated total intracranial volume; AD: Alzheimer's disease)
